# Supplementary material
Source: publisher figshare collection journal article supplement (https://acs.figshare.com/ndownloader/files/15317297)
Supplement: Supplementary file 1 [file 15317297]

## Supporting Information for

### Room-Temperature Sintering of Tri-*n*-Octylphosphine-Oxide-Capped Silver Nanoparticle Paste by Dipping into an Organic Solvent Containing a Sintering Agent

Soichiro Okada,<sup>a</sup> Yoshio Nakahara,<sup>a\*</sup> Mitsuru Watanabe,<sup>b</sup> Toshiyuki Tamai,<sup>b</sup> Yasuyuki Kobayashi,<sup>b</sup> and Setsuko Yajima<sup>a</sup>

<sup>a</sup>*Department of Applied Chemistry, Faculty of Systems Engineering, Wakayama University, 930 Sakae-dani, Wakayama 640-8510, Japan*

<sup>b</sup>*Morinomiya Center, Osaka Research Institute of Industrial Science and Technology, 1-6-50, Morinomiya, Joto-ku, Osaka 536-8553, Japan*

## Supporting Information

TEM image and particle size distribution of oleic-acid-capped Ag NPs (Figure S1).

EDS spectra of the Ag thin films prepared from the TOPO-capped Ag NP paste (Figure S2, S3)

SEM image of the Ag thin film prepared from the TOPO-capped Ag NP paste (Figure S4)

SEM image of the Ag thin film prepared from the oleic-acid-capped Ag NP paste (Figure S5, S7)

TGA curve of the Ag thin film prepared from the TOPO-capped Ag NP paste (Figure S6)

EDS spectrum of the Ag thin film prepared from the oleic-acid-capped Ag NP paste (Figure S8)

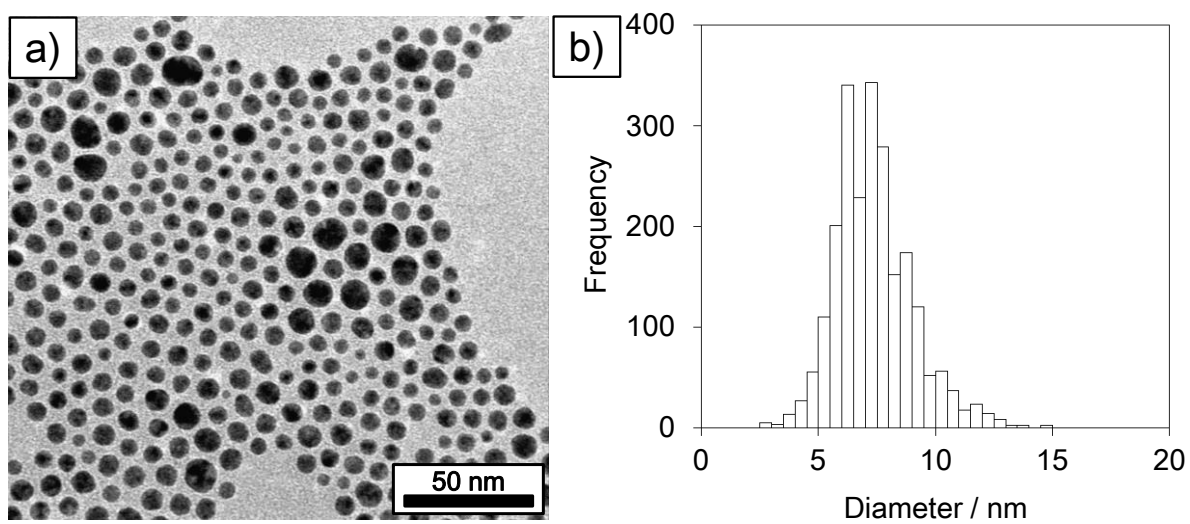

**Figure S1.** (a) TEM image and (b) particle size distribution of oleic-acid-capped Ag NPs.

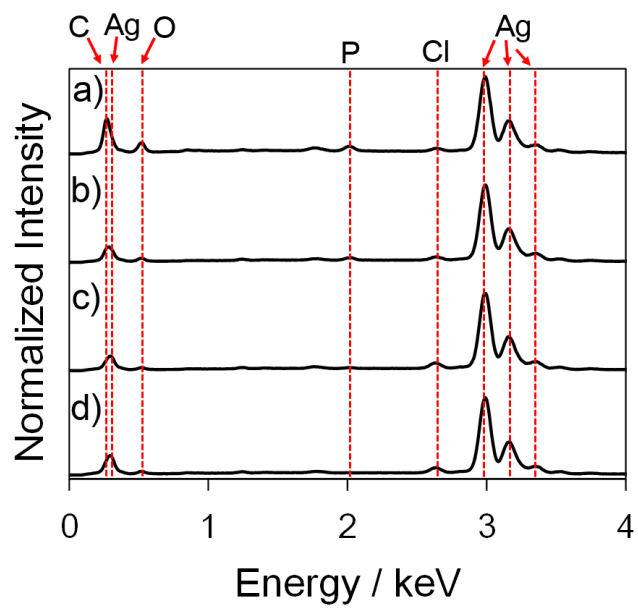

**Figure S2.** EDS spectra of the Ag thin films prepared from the TOPO-capped Ag NP paste by dipping into methanol (a) without and with (b) 0.040 mM, (c) 0.20 mM, (d) 1.0 mM CTAC.

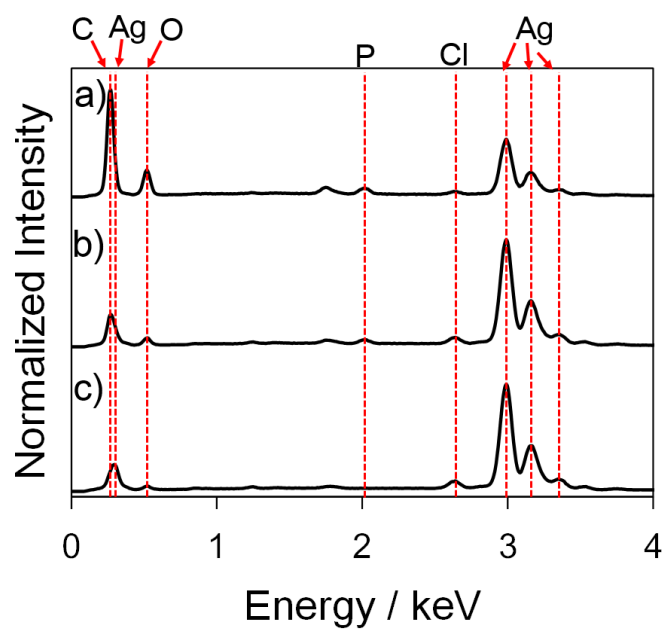

**Figure S3.** EDS spectra of the Ag thin films prepared from the TOPO-capped Ag NP paste by dipping into 1.0 mM CTAC methanol solution for (a) 1 min, (b) 2 min, and (c) 120 min.

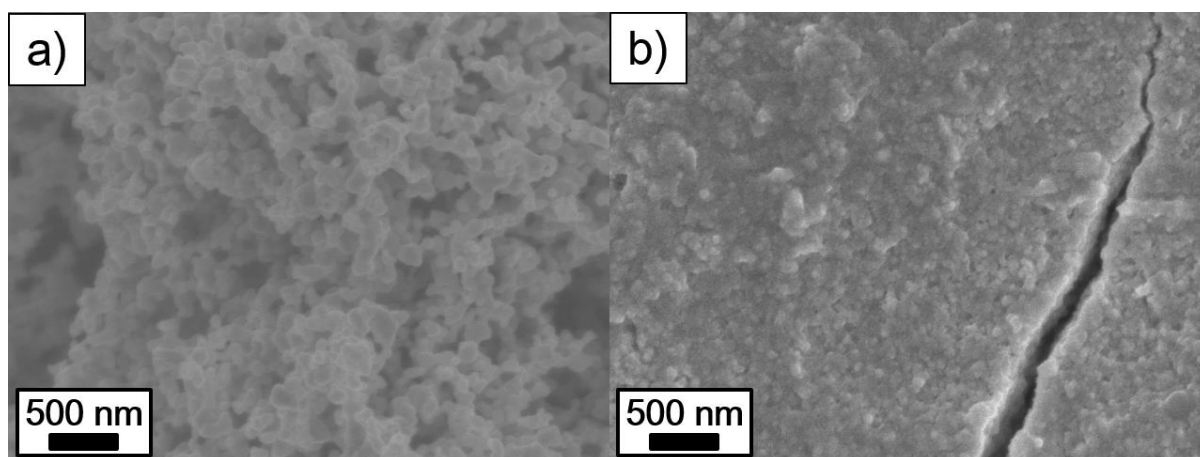

**Figure S4.** SEM images of the Ag thin films prepared from the TOPO-capped Ag NP paste by dipping into 1.0 mM CTAC (a) ethanol and (b) 1-propanol solution for 120 min

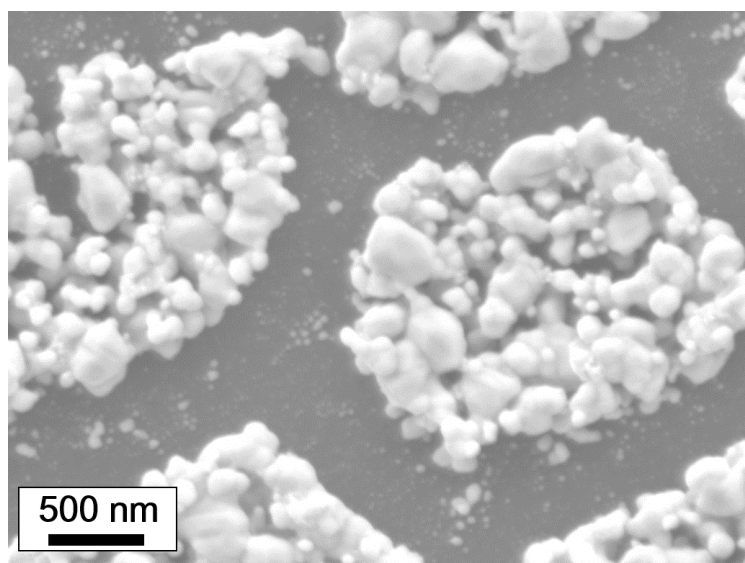

**Figure S5.** SEM image of the Ag thin film prepared from the oleic-acid-capped Ag NP paste by dipping into 1.0 mM CTAC methanol solution for 120 min.

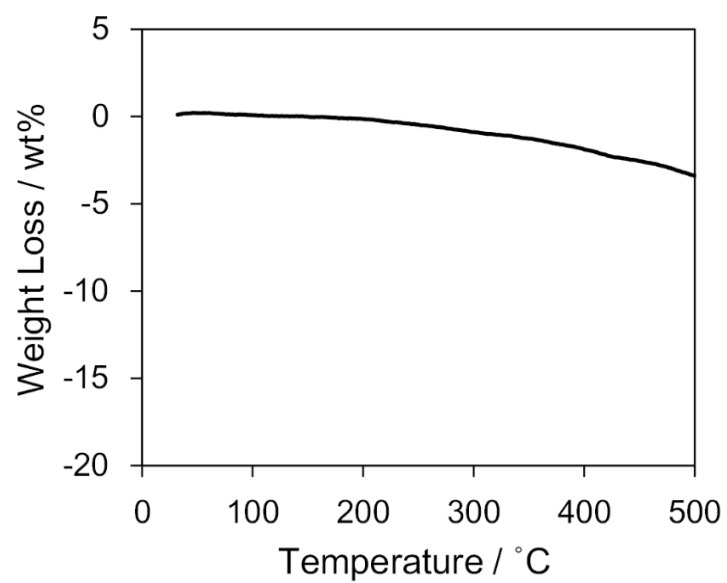

**Figure S6.** TGA curve of the Ag thin film prepared from the TOPO-capped Ag NP paste by dipping into 1.0 mM CTAC methanol solution for 120 min.

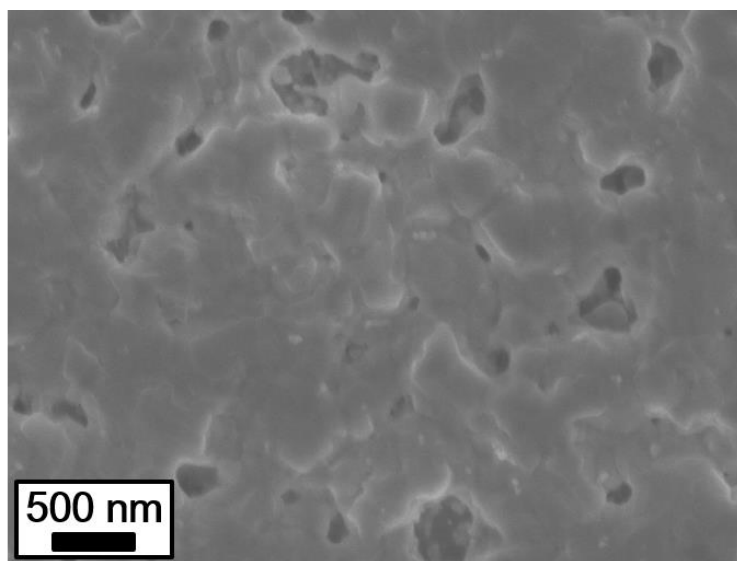

**Figure S7.** SEM image of the Ag thin film prepared from the oleic-acid-capped Ag NP paste by the thermal sintering (350 °C, 120 min).



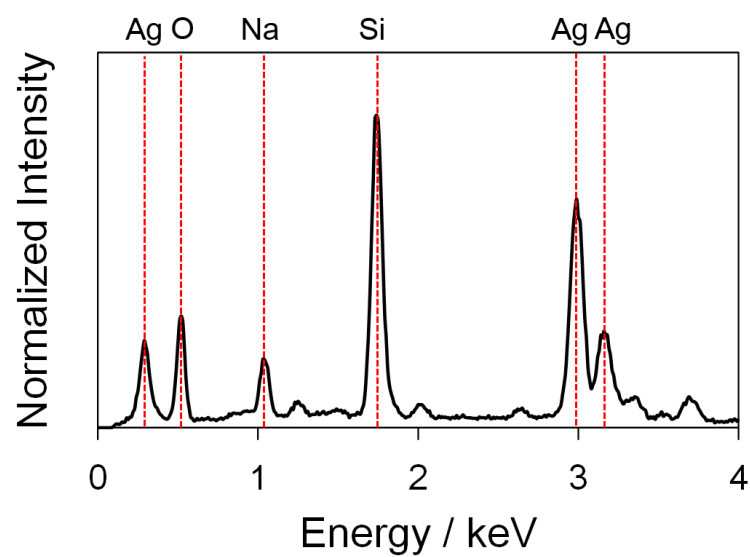

**Figure S8.** EDS spectrum of the Ag thin film prepared from the oleic-acid-capped Ag NP paste by the thermal sintering (350 °C, 120 min).
